# Supplementary material
Source: publisher site journal article supplement (https://www.dovepress.com/article/257312)
Supplement: Supplementary file 1 [file get_supplementary_file.php]

**Novel T7-modified pH-responsive targeted nanosystem for co-delivery of docetaxel and curcumin in the treatment of esophageal cancer**

Lian Deng<sup>1,\*</sup>, Xiongjie Zhu<sup>1,\*</sup>, Zhongjian Yu<sup>1</sup>, Ying Li<sup>1</sup>, Lingyu Qin<sup>1</sup>, Zhile Liu<sup>1</sup>, Longbao Feng<sup>2</sup>, Rui Guo<sup>2,#</sup>, Yanfang Zheng<sup>1,#</sup>

<sup>1</sup>Department of Oncology, Zhujiang Hospital of Southern Medical University, Guangzhou 510220, China

<sup>2</sup>Key Laboratory of Biomaterials of Guangdong Higher Education Institutes, Guangdong Provincial Engineering and Technological Research Center for Drug Carrier Development, Department of Biomedical Engineering, Jinan University, Guangzhou 510632, China

\* Contributed equally to this work.

**#Corresponding Authors:** Yanfang Zheng, Tel: 18665000236, E-mail: 18665000236@163.com; Rui Guo, E-mail: guorui@jnu.edu.cn.

**Figure Captions:**

**Figure S1:** TfR expression in ESCC. High TfR expression in ESCC was demonstrated by qPCR (A) and verified by flow cytometry (B, C). \* P < 0.05.

**Figure S2:** Characterization of nanoparticles. The successful synthesis of T7-NP was demonstrated by <sup>1</sup>H NMR.

**Figure S3:** pH stimuli-responsive drug-release *in vitro*. Cumulative drug-release was measured by UV spectroscopy (UV-S) and HPLC (A-B).

**Figure S4:** Biocompatibility of nanoparticles. Cells were pretreated with different nanoparticles (NP and T7-NP) at different concentrations. CCK-8 assay demonstrated that there was no damage to cells by nanoparticles at high concentration (A, B).

**Figure S5:** Simulation of anti-tumor effect by 3D tumorsphere. 3D tumorspheres were prepared *in vitro* to simulate tumors and treated with various formulations (PBS, DTX, NP-D, NP-DC, T7-NP-D and T7-NP-DC). Apoptosis was determined by optical microscopy (A, B).

**Figure S6:** Synergistic anti-tumor efficacy of nanomedicines in ESCC. Cells (KYSE510) were incubated with different treatments (DTX, CUR, NP, NP-T7, NP-D, NP-C, NP-DC, T7-NP-D, T7-NP-C and T7-NP-DC) for 48 h. Cell viability was then measured by flow cytometry (A, B) and CCK-8 assay (C). \* P < 0.05, \*\* P < 0.01.

**Figure S7:** Preferential cellular uptake of T7-modified nanoparticles. Cells (KYSE510) in good condition were pretreated with FITC-labeled nanoparticles composed of different treatments. The fluorescence intensity in cells was then observed using a confocal microscope. Cellular uptake of T7-decorated nanoparticles was superior to that of nanoparticles without T7-decoration..

**Figure S8:** Biosafety of nanomedicines in respect of main organ function and hematopoietic function of bone marrow.

**Table S1:** Combination index (CI) of different drug formulations in KYSE510.

| DTX (ng/ml) | DTX:CUR 2:1 | DTX:CUR 1:1 | DTX:CUR 1:2 |
|-------------|-------------|-------------|-------------|
|             | CI          | CI          | CI          |
| 0.0625      | 0.17033     | 0.16518     | 0.10746     |
| 0.125       | 0.22973     | 0.25660     | 0.18218     |
| 0.25        | 0.44085     | 0.16610     | 0.15473     |
| 0.5         | 0.33826     | 0.22142     | 0.19966     |
| 1           | 0.44548     | 0.37128     | 0.36934     |
| 2           | 0.71650     | 0.60316     | 0.54217     |
| 4           | 1.25438     | 0.78015     | 0.71996     |
| 8           | 1.61885     | 1.40310     | 0.99193     |

**Table S2:** IC<sub>50</sub> values of different DTX formulations in KYSE150 and KYSE510.

| Formulations   | IC <sub>50</sub> DTX(ng/ml) |               |
|----------------|-----------------------------|---------------|
|                | KYSE150                     | KYSE510       |
| Free DTX       | 13.49±2.57                  | 3.07±0.62     |
| NP-DTX         | 12.066±1.33                 | 2.64±0.26     |
| NP-DTX/CUR     | 9.47±0.55 **                | 2.38±0.94 *   |
| T7-NP-DTX      | 5.57±0.37 ***               | 1.36±0.12 *** |
| T7- NP-DTX/CUR | 3.15±0.78 ***               | 0.43±0.11 *** |

\* P < 0.05, \*\* P < 0.01, \*\*\* P < 0.005

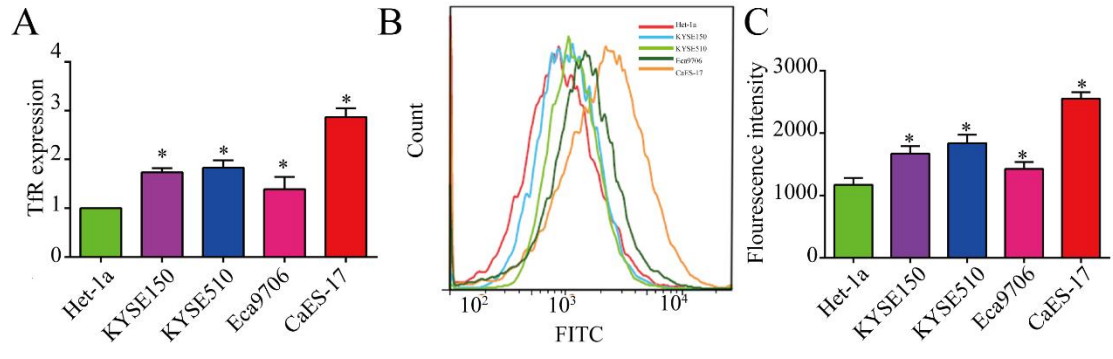

Figure S1

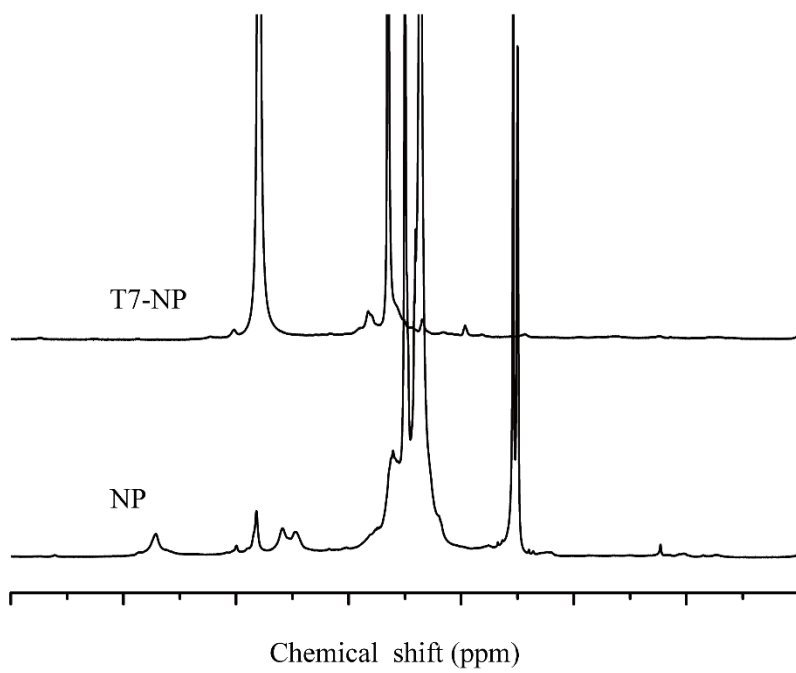

Figure S2

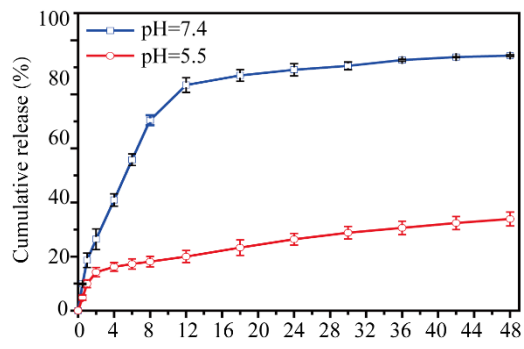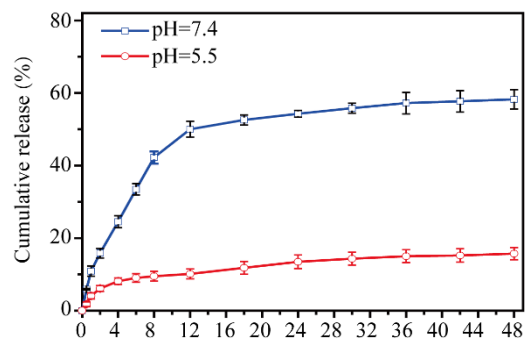

Figure S3

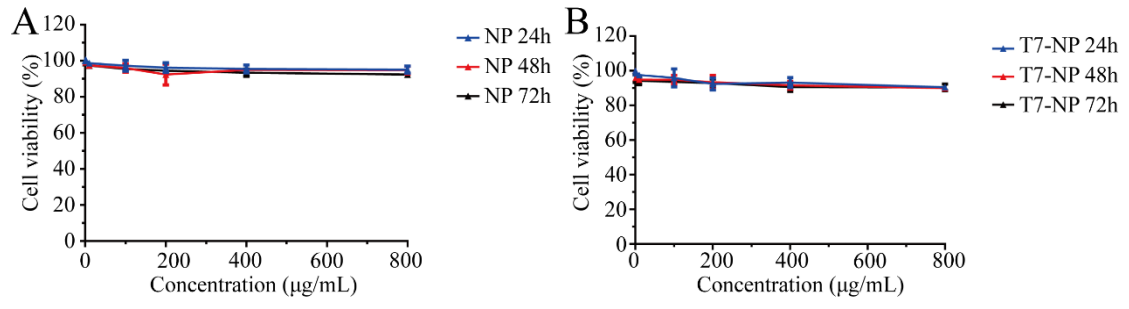

Figure S4



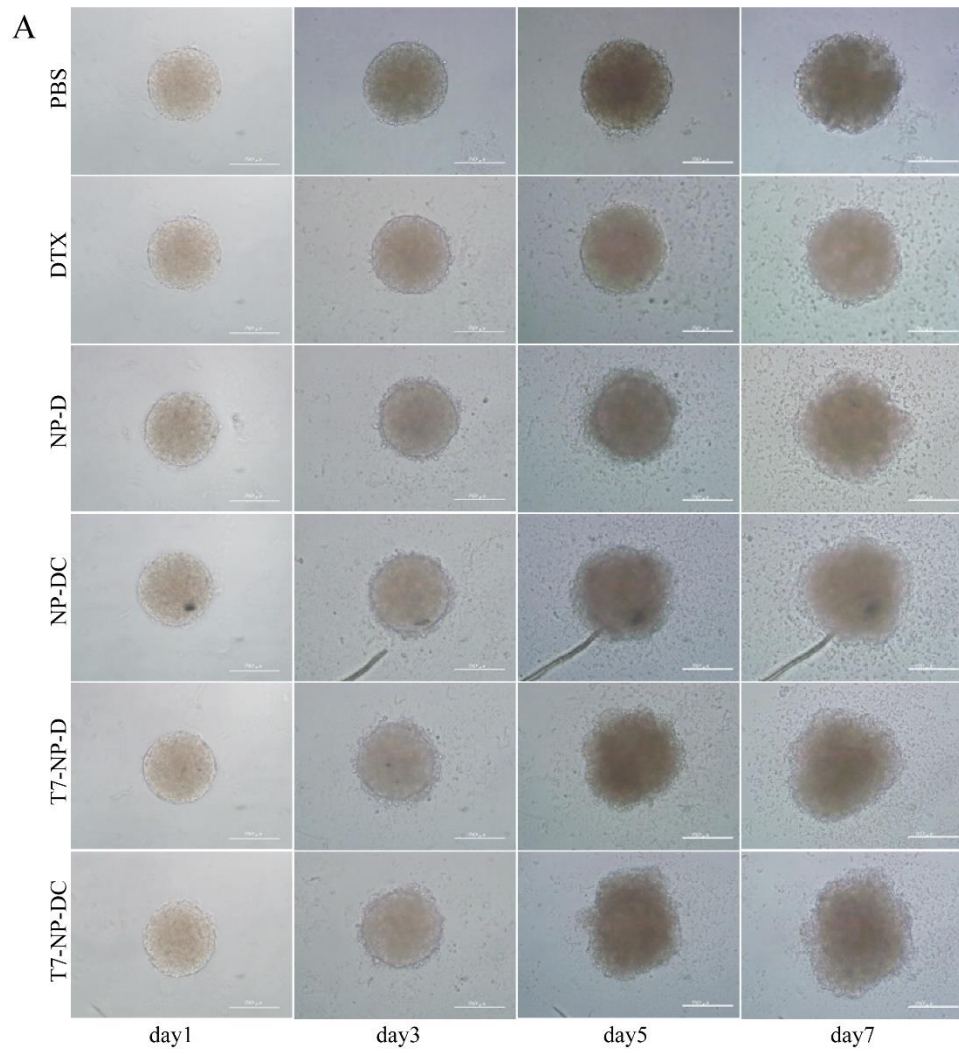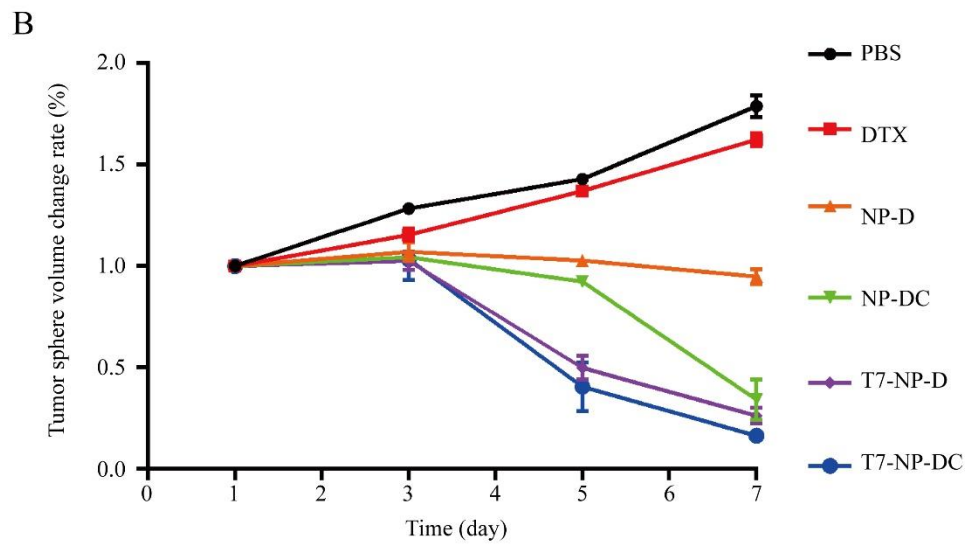

Figure S5

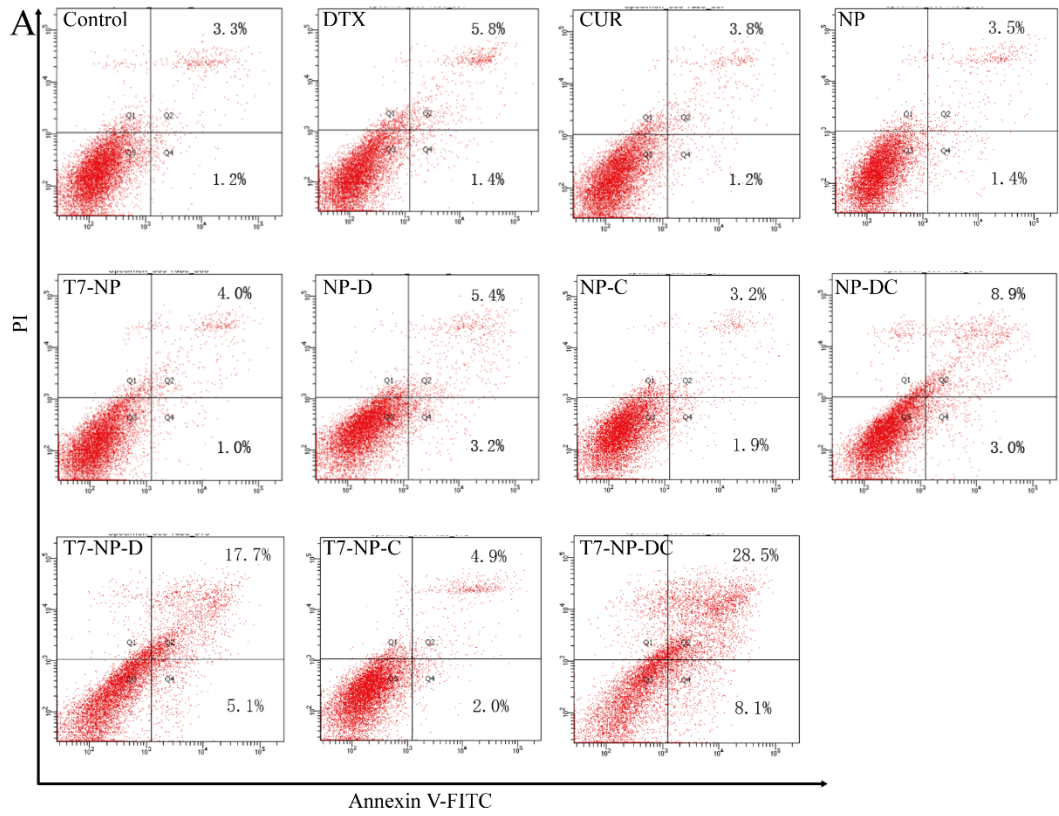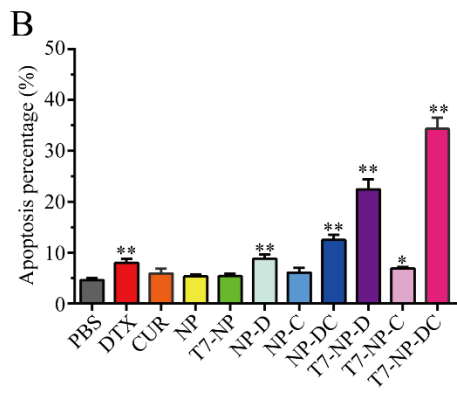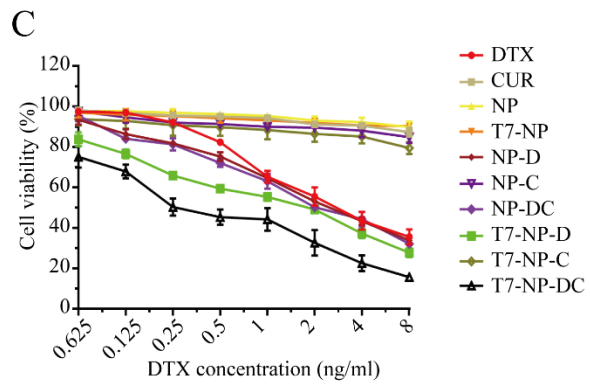

Figure S6

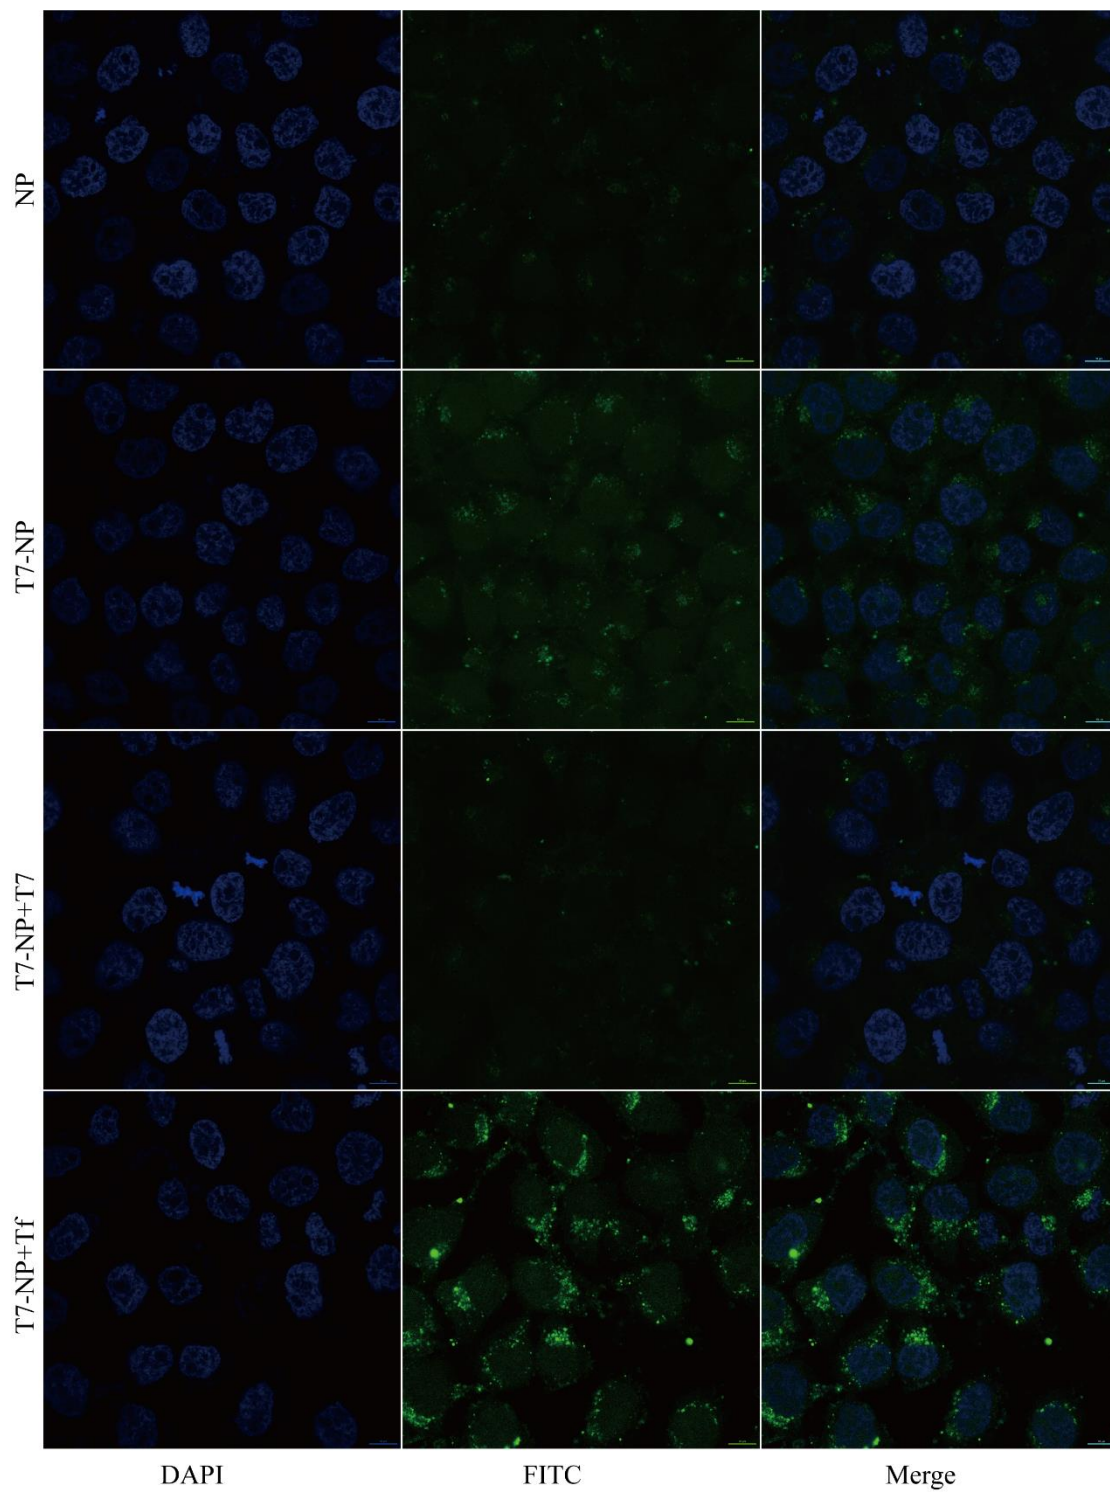

Figure S7

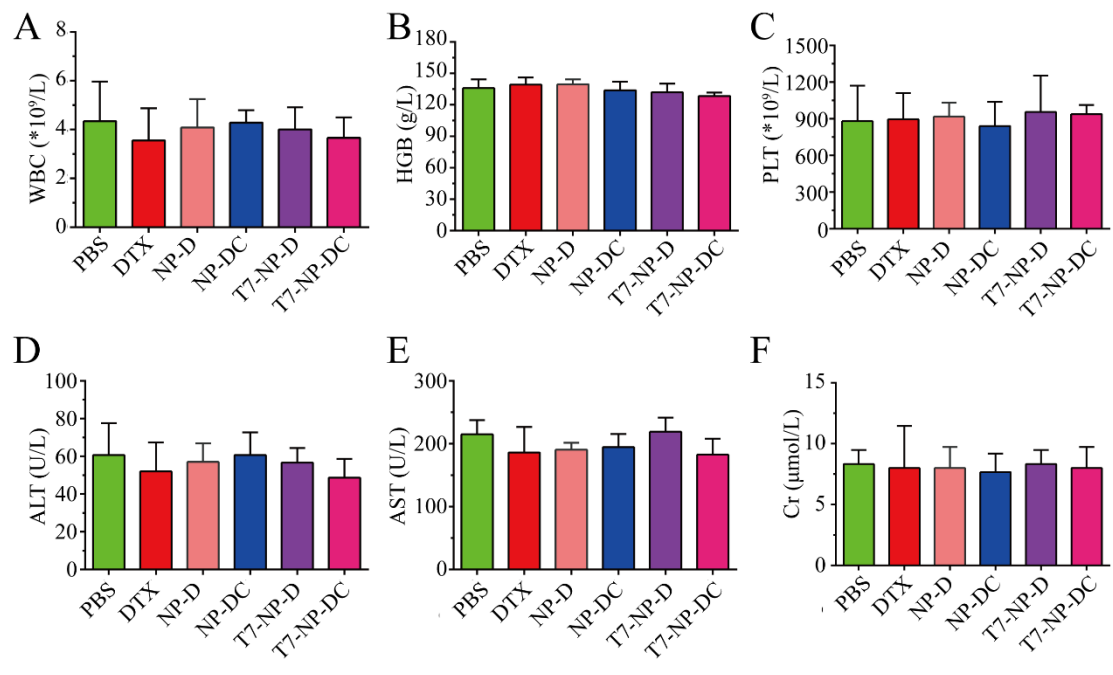

Figure S8
